# Supplementary material for: Ripening-induced chemical modifications of papaya pectin inhibit cancer cell proliferation
Source: PubMed Central journal article supplement (PMC5707353; doi:10.1038/s41598-017-16709-3), 2017-11-29
Supplement: 41598_2017_16709_MOESM1_ESM.pdf [file 41598_2017_16709_MOESM1_ESM.pdf]

## Supplementary information

### **Ripening-induced chemical modifications of papaya pectin inhibit cancer cell proliferation**

Samira Bernardino Ramos do Prado<sup>1</sup>, Gabrielle Fernandez Ferreira<sup>1</sup>, Yosuke Harazono<sup>2,3</sup>, Tânia Misuzu Shiga<sup>1</sup>, Avraham Raz<sup>2</sup>, Nicholas C. Carpita<sup>4</sup>, João Paulo Fabi<sup>1,5,6\*</sup>

<sup>1</sup>Department of Food Science and Experimental Nutrition, School of Pharmaceutical Sciences, University of São Paulo, São Paulo, SP, Brazil

<sup>2</sup>Departments of Oncology and Pathology, School of Medicine, Wayne State University, and Karmanos Cancer Institute, Detroit, MI, USA.

<sup>3</sup>Department of Maxillofacial Surgery, Tokyo Medical and Dental University, Bunkyo-ku, Tokyo 113–8510, Japan.

<sup>4</sup>Department of Botany & Plant Pathology, Purdue University, West Lafayette, IN, USA.

<sup>5</sup>Food and Nutrition Research Center (NAPAN), University of São Paulo, São Paulo, SP, Brazil.

<sup>6</sup>Food Research Center (FoRC), CEPID-FAPESP (Research, Innovation and Dissemination Centers, São Paulo Research Foundation), São Paulo, SP, Brazil.

\*Correspondence: Departamento de Alimentos e Nutrição Experimental, FCF, Universidade de São Paulo, Av. Lineu Prestes 580, Bloco 14, CEP 05508-900, São Paulo – SP, Brazil. Tel. +55 11 30913647, email: jpfabi@usp.br

**Table S1.** Papaya water-soluble polysaccharides linkage analysis (PP: papaya pectin from different harvesting days – 1, 2 3 and 4).

| Monomer    | 1PP        | 2PP        | Mol (%)    |            |
|------------|------------|------------|------------|------------|
|            |            |            | 3PP        | 4PP        |
| t-Rha      | 0.8 ± 0.2  | 0.6 ± 0.3  | 0.7 ± 0.2  | 0.5 ± 0.1  |
| 2-Rha      | 0.8 ± 0.2  | 1.6 ± 0.3  | 2.0 ± 0.2  | 1.7 ± 0.1  |
| 2,4-Rha    | 0.1 ± 0.1  | 0.7 ± 0.2  | 1.1 ± 0.1  | 1.1 ± 0.1  |
| t-Fuc      | 0.0 ± 0.0  | 0.0 ± 0.0  | 0.0 ± 0.0  | 0.0 ± 0.0  |
| 2,4-Fuc    | 0.1 ± 0.1  | 0.1 ± 0.1  | 0.1 ± 0.1  | 0.1 ± 0.1  |
| t-Araf     | 2.1 ± 0.1  | 1.1 ± 0.2  | 0.6 ± 0.1  | 0.5 ± 0.1  |
| t-Arap     | 0.9 ± 0.1  | 0.5 ± 0.2  | 0.8 ± 0.1  | 0.7 ± 0.1  |
| 2-Araf     | 0.1 ± 0.0  | 0.1 ± 0.1  | 0.1 ± 0.1  | 0.1 ± 0.0  |
| 3-Araf     | 0.7 ± 0.1  | 0.3 ± 0.1  | 0.4 ± 0.1  | 0.4 ± 0.1  |
| 5-Ara(f)   | 1.0 ± 0.1  | 0.5 ± 0.1  | 0.8 ± 0.1  | 0.7 ± 0.1  |
| 2,5-Ara(f) | 0.0 ± 0.0  | 0.0 ± 0.0  | 0.0 ± 0.0  | 0.0 ± 0.0  |
| 3,5-Ara(f) | 0.0 ± 0.0  | 0.0 ± 0.0  | 0.1 ± 0.1  | 0.0 ± 0.0  |
| Ara(OAc)5  | 1.0 ± 0.2  | 0.9 ± 0.1  | 0.7 ± 0.1  | 0.6 ± 0.1  |
| t-Xylp     | 0.7 ± 0.2  | 0.2 ± 0.1  | 0.4 ± 0.1  | 0.2 ± 0.1  |
| 2-Xyl      | 0.2 ± 0.1  | 0.2 ± 0.1  | 0.1 ± 0.1  | 0.1 ± 0.1  |
| 2,4-Xyl    | 0.1 ± 0.1  | 0.1 ± 0.1  | 0.1 ± 0.0  | 0.1 ± 0.0  |
| 4-Xyl      | 0.9 ± 0.1  | 0.8 ± 0.1  | 0.4 ± 0.1  | 0.5 ± 0.1  |
| 3,4-Xyl    | 0.1 ± 0.1  | 0.1 ± 0.1  | 0.1 ± 0.1  | 0.1 ± 0.1  |
| Xyl(OAc)5  | 0.3 ± 0.1  | 0.5 ± 0.2  | 0.2 ± 0.1  | 0.2 ± 0.1  |
| t-Man      | 0.0 ± 0.0  | 0.0 ± 0.0  | 0.0 ± 0.0  | 0.0 ± 0.0  |
| 4-Man      | 0.3 ± 0.1  | 0.3 ± 0.1  | 0.1 ± 0.1  | 0.3 ± 0.1  |
| 4,6-Man    | 0.0 ± 0.0  | 0.0 ± 0.0  | 0.0 ± 0.0  | 0.0 ± 0.0  |
| Man(OAc)6  | 0.7 ± 0.1  | 0.7 ± 0.1  | 0.5 ± 0.1  | 1.0 ± 0.1  |
| t-Gal      | 0.8 ± 0.1  | 1.0 ± 0.3  | 2.6 ± 0.6  | 1.8 ± 0.3  |
| 2-Gal      | 0.1 ± 0.1  | 0.2 ± 0.1  | 0.1 ± 0.1  | 0.1 ± 0.1  |
| 3-Gal      | 0.2 ± 0.1  | 0.1 ± 0.1  | 0.2 ± 0.1  | 0.3 ± 0.1  |
| 3,4-Gal    | 0.6 ± 0.2  | 0.5 ± 0.2  | 0.2 ± 0.1  | 0.1 ± 0.1  |
| 4-Gal      | 1.0 ± 0.1  | 0.8 ± 0.2  | 1.1 ± 0.2  | 0.3 ± 0.1  |
| 2,4-Gal    | 0.3 ± 0.1  | 0.8 ± 0.2  | 0.3 ± 0.1  | 0.4 ± 0.2  |
| 3,6-Gal    | 4.4 ± 0.1  | 2.7 ± 0.3  | 2.7 ± 0.2  | 1.9 ± 0.3  |
| 4,6-Gal    | 0.4 ± 0.1  | 0.4 ± 0.1  | 1.1 ± 0.4  | 0.4 ± 0.2  |
| 6-Gal      | 4.6 ± 0.4  | 1.9 ± 0.3  | 2.1 ± 0.2  | 2.2 ± 0.2  |
| 2,4,6-Gal  | 0.1 ± 0.1  | 0.4 ± 0.3  | 0.2 ± 0.1  | 0.4 ± 0.2  |
| Gal(OAc)6  | 1.2 ± 0.5  | 2.3 ± 0.6  | 1.2 ± 0.3  | 1.0 ± 0.2  |
| t-GalA     | 1.9 ± 0.4  | 2.6 ± 0.5  | 7.9 ± 2.8  | 4.2 ± 0.2  |
| 4-GalA     | 60.7 ± 2.4 | 64.3 ± 2.1 | 58.5 ± 3.5 | 68.5 ± 2.0 |
| 3,4-GalA   | 0.4 ± 0.2  | 0.5 ± 0.1  | 0.4 ± 0.2  | 0.3 ± 0.1  |
| 4,6 GalA   | 6.4 ± 1.3  | 8.0 ± 1.1  | 5.5 ± 0.6  | 5.0 ± 1.1  |
| 2,4 GalA   | 2.6 ± 1.1  | 5.1 ± 2.1  | 2.8 ± 0.7  | 1.8 ± 0.5  |
| t-Glc      | 0.3 ± 0.1  | 0.1 ± 0.1  | 0.2 ± 0.2  | 0.1 ± 0.1  |
| 2-Glc      | 0.1 ± 0.1  | 0.1 ± 0.2  | 0.1 ± 0.2  | 0.1 ± 0.1  |
| 3-Glc      | 0.4 ± 0.1  | 0.1 ± 0.1  | 0.2 ± 0.1  | 0.2 ± 0.1  |
| 4-Glc      | 0.8 ± 0.1  | 1.1 ± 0.1  | 0.7 ± 0.1  | 0.6 ± 0.1  |
| 3,4-Glc    | 0.3 ± 0.1  | 0.3 ± 0.3  | 0.9 ± 0.2  | 0.7 ± 0.1  |
| 4,6-Glc    | 0.1 ± 0.1  | 0.8 ± 0.1  | 0.1 ± 0.2  | 0.1 ± 0.1  |
| Glc(OAc)6  | 0.5 ± 0.1  | 0.5 ± 0.1  | 0.6 ± 0.1  | 0.5 ± 0.1  |
| t-GlcA     | 1.1 ± 0.3  | 1.8 ± 0.5  | 1.5 ± 0.3  | 1.8 ± 0.3  |

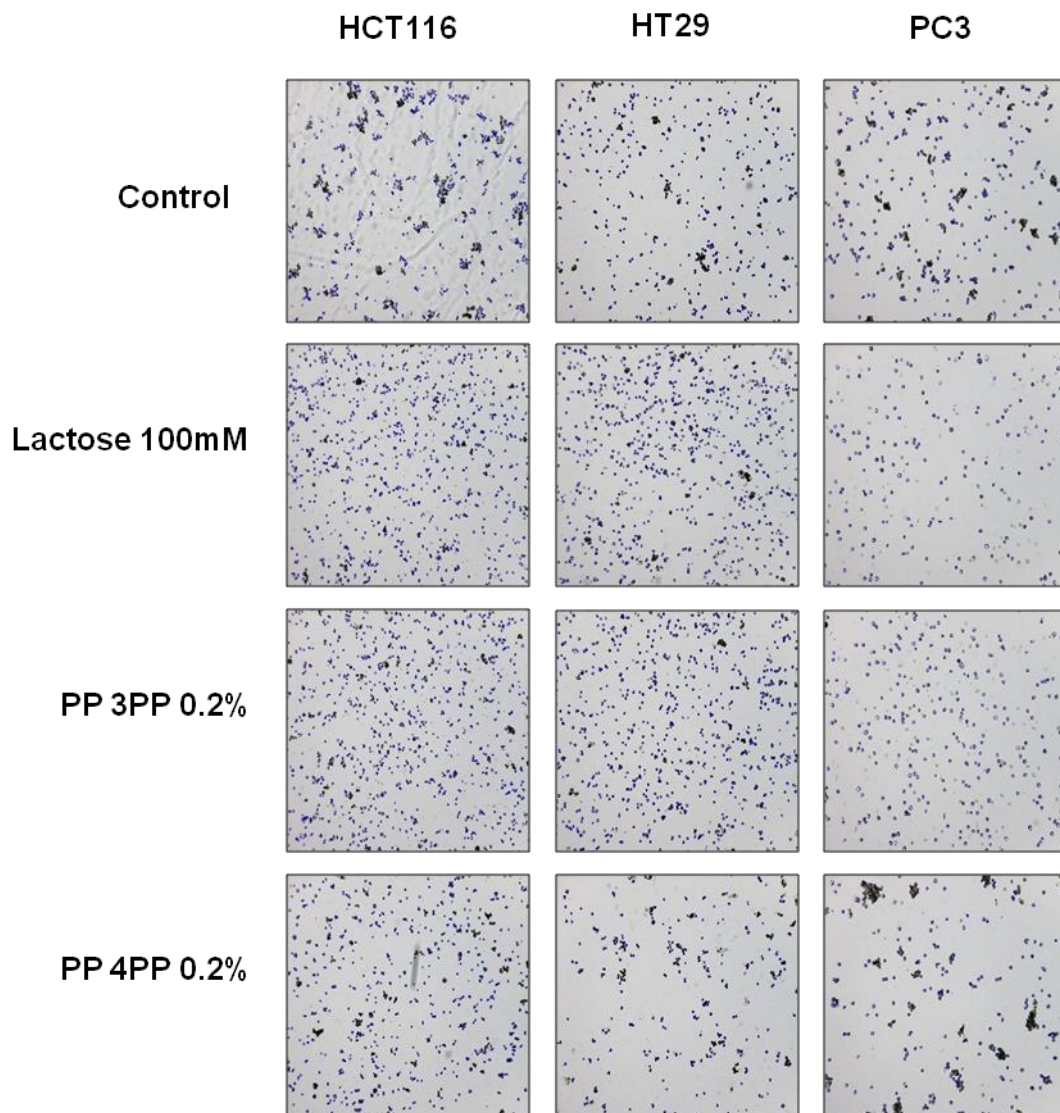

**Figure S1. Homotypic aggregation.** Cells were counted in an automatic cell counter and the blue circles were automatic generated by the machine software and is related to single or double cells.

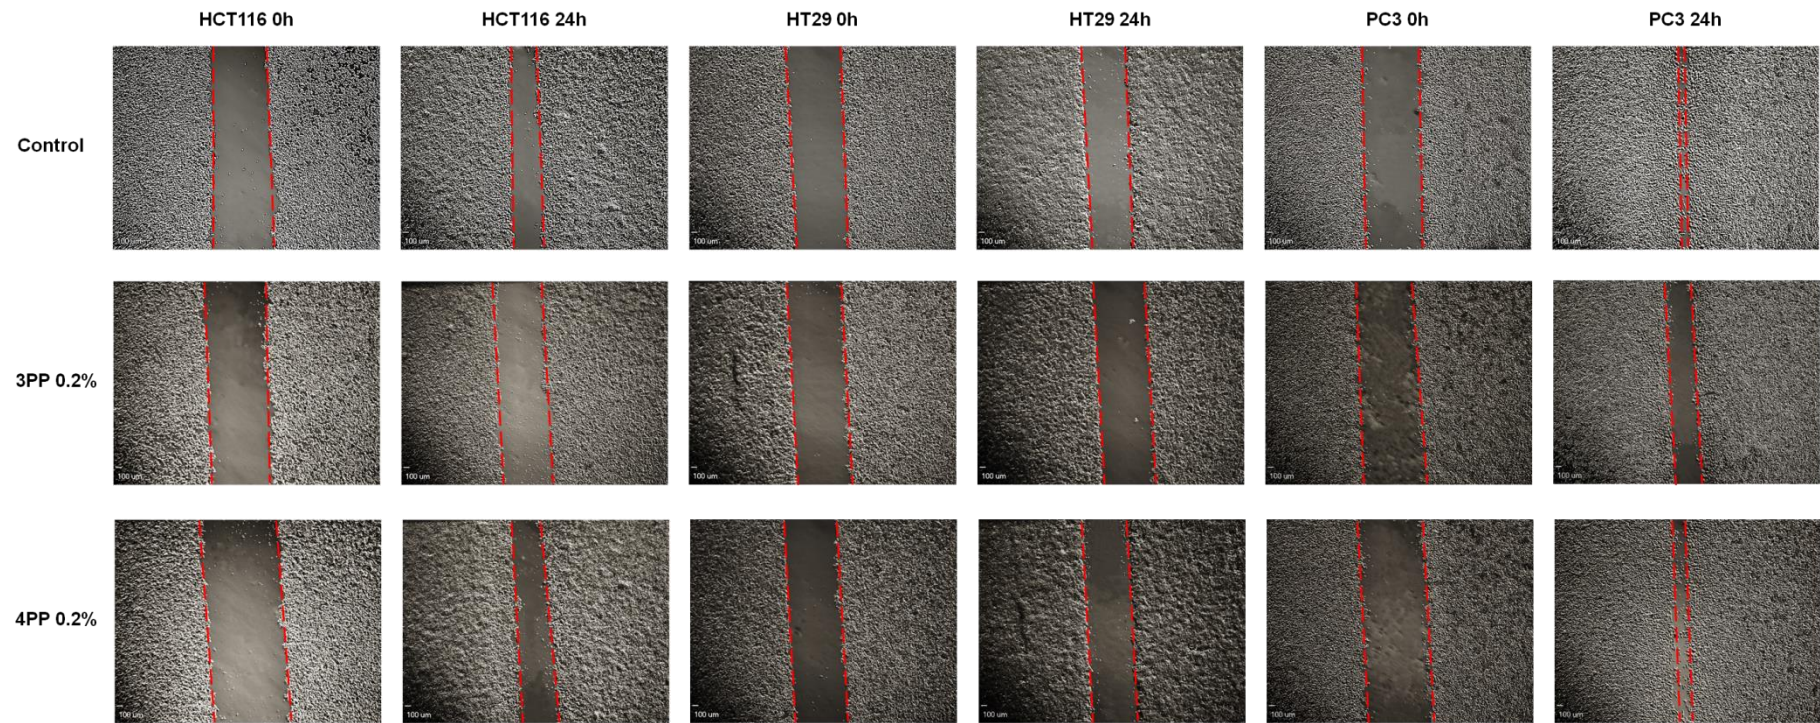

**Figure S2. Migration assay based on wound healing assay.** Photographs of cancer cell cultures in 0 h (after scratching) and after 24 h of treatment or not (control) indicating the wound closure. Scale bar: 100 μm.

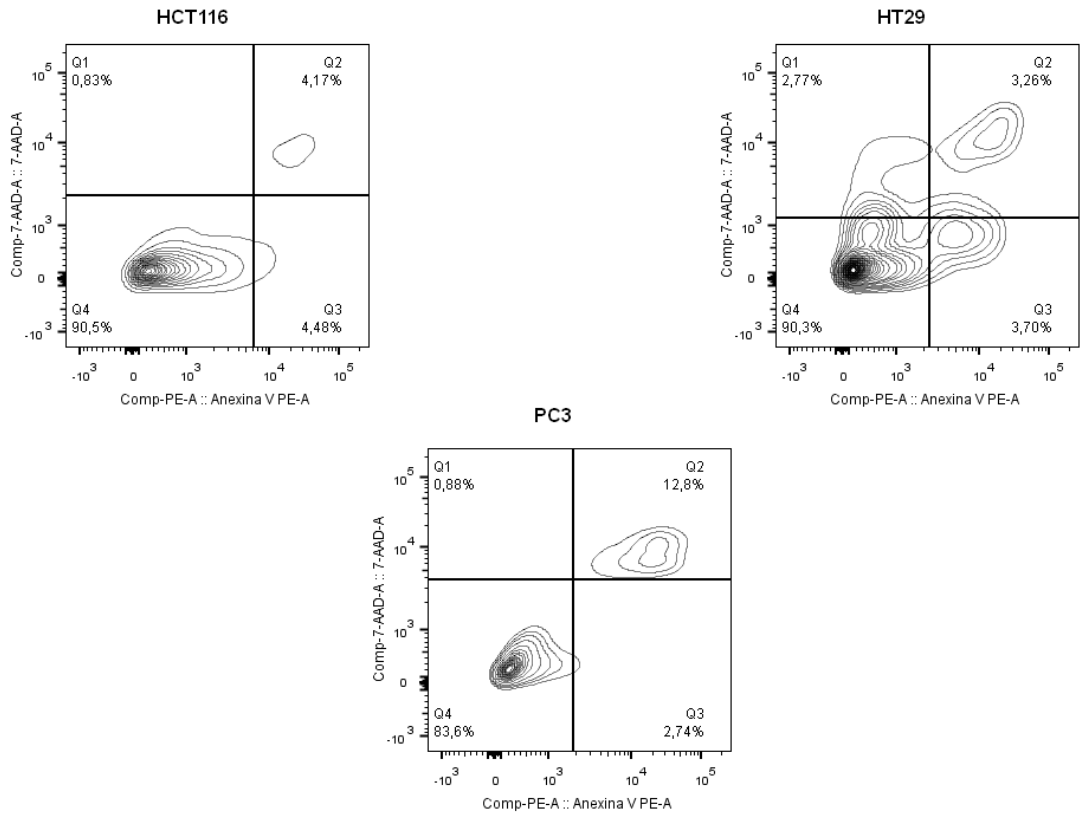

**Figure S3. Effects of lactose in HCT116, HT29 and PC3 apoptosis by flow cytometry.** Lactose did not induce cell death. Cells were treated with 100 mM of lactose for 24 h.

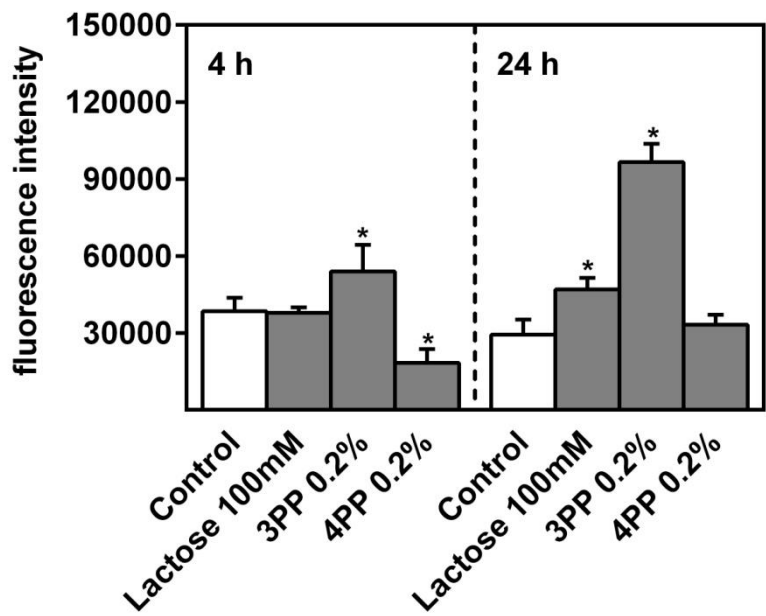

**Figure S4. ROS detection on HCT116 cells measured by DCFDA. 3PP and not 4PP induced ROS accumulation.** Cells were treated and after 4 h or 24 h cells were incubated with DCFDA for 45 min. Data was expressed as mean  $\pm$  SD of fluorescence ratios for two independent experiments. \* $P < 0.05$  vs control, according to Dunnett's test. PP: papaya pectin (water-soluble fraction).

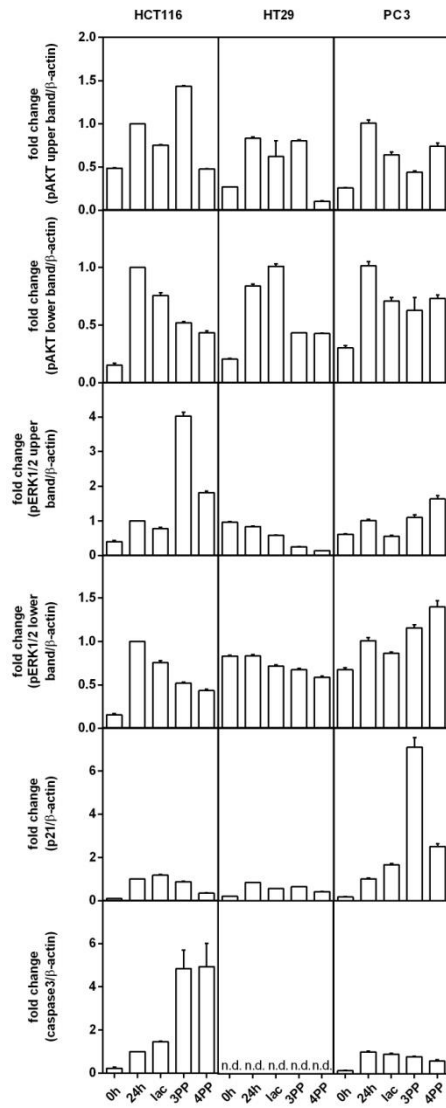

**Figure S5. Relative density of bands from western blotting experiments.** PP: papaya pectin (water-soluble fraction). Band intensities were separated in upper and lower bands for pAKT and pERK1/2 from two experiments.

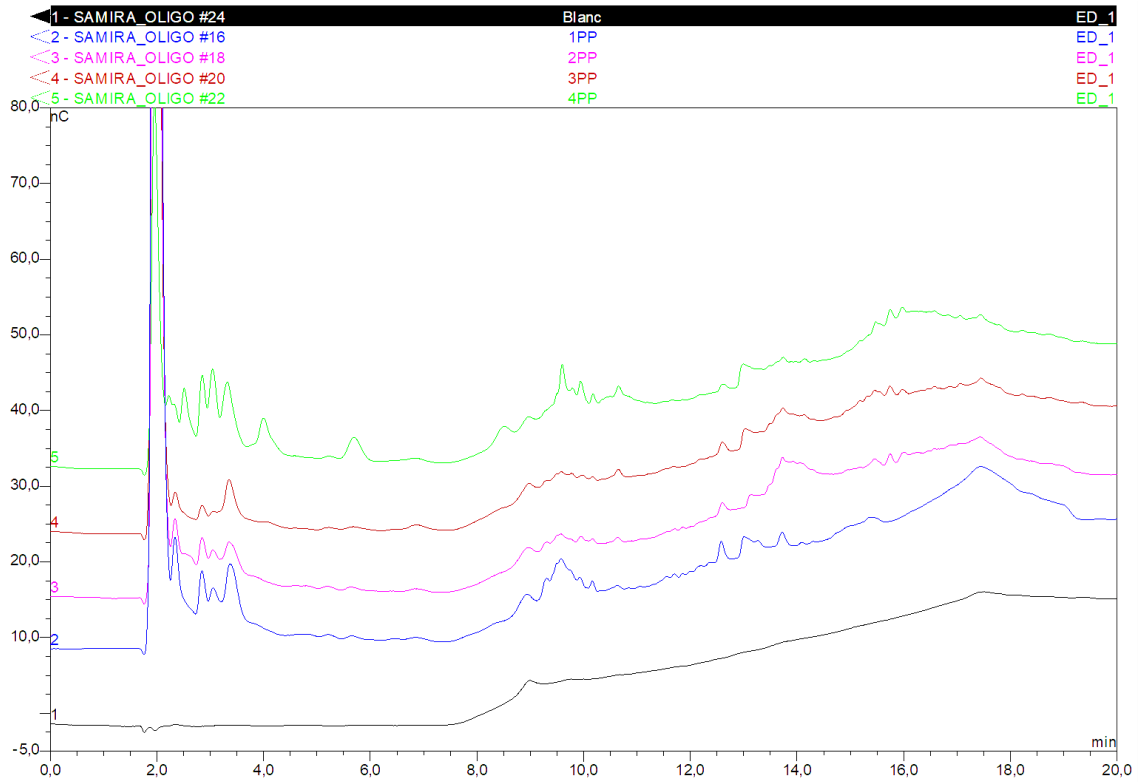

**Figure S6. Qualitative analysis for oligosaccharide detection in papaya pectins.** Black line: Blank. Blue line: 1PP. Purple line: 2PP. Red line: 3PP. Green line: 4PP.

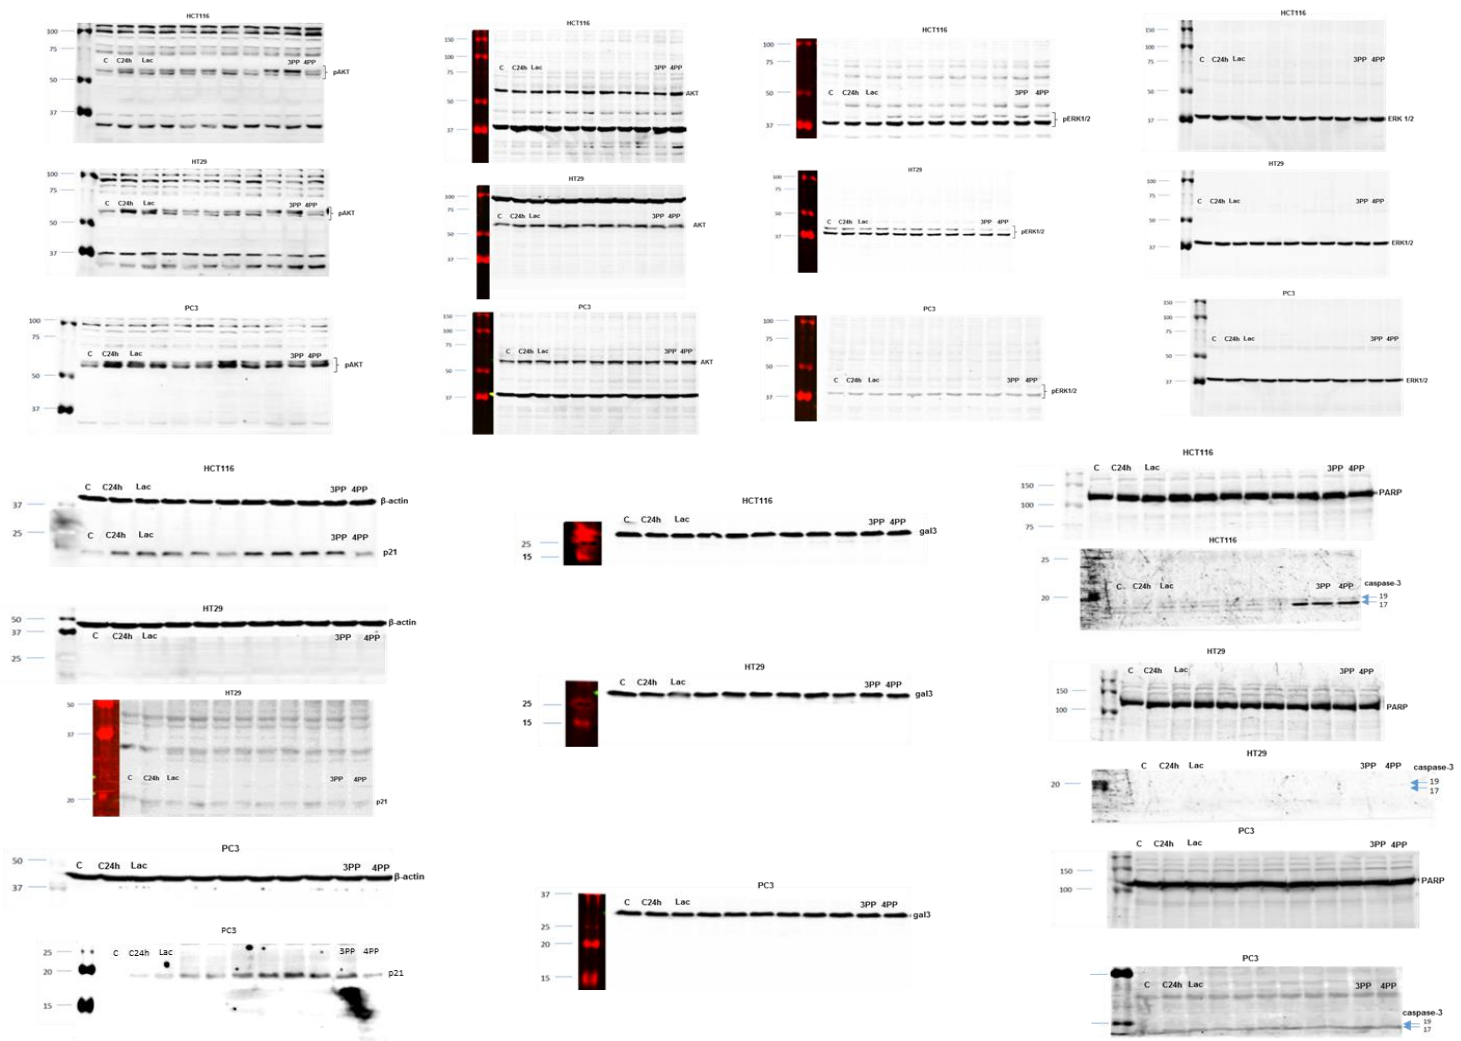

Figure S6. Representative western blotting from proteins analyzed in the article.
